# Supplementary material
Source: publisher figshare collection journal article supplement (https://gsapubs.figshare.com/ndownloader/files/22537448)
Supplement: Supplementary file 1 [file 22537448]

## Sheet: 50yr Log Data
SUPPLEMENTAL DATA FILE 5: POWICK PRINCIPAL COMPONENT ANALYSIS
		MEAN ANALYTICAL RESULTS BY 50 YEAR PERIOD
Period	Total (n)	Log Grain Size	% Sand	Net Log pIRSL	Net Log pOSL	LogZr:Rb	Log Magnetic Susceptibility	Log Carbonate
1950-Present	17	2.62406	2.41577	1.06202	6.19147	1.97627	-1.74861	-0.45037
1900-1949	12	2.62843	2.7935	1.12876	6.71949	2.4054	-0.761352	-1.91874
1850-1899	11	2.60094	2.83396	2.52076	8.73015	2.94736	0.21628	-2.27292
1800-1849	12	2.08073	2.25626	1.95268	7.32624	2.50572	-0.339981	-1.68176
1750-1799	12	1.36889	1.59104	0.445967	4.22145	1.45693	-1.0092	-0.2916
1700-1749	11	1.22596	1.37259	0.963072	5.37682	1.20149	-0.735488	-1.08026
1650-1699	12	0.986189	0.73461	1.06715	5.80505	0.658586	-0.817415	-0.569363
1600-1649	11	0.79056	0.440094	-0.855474	1.66217	0.625519	-1.02405	-0.435966
1550-1599	12	0.938676	0.645322	-0.804759	1.77126	0.528484	-1.07869	-0.698812
1500-1549	11	-0.219709	-0.328339	-1.06018	0.910757	-0.343054	-0.216294	0.236146
1450-1499	12	-0.409841	-0.453633	-1.33829	0.251103	-0.831969	-1.4728	1.19775
1400-1449	12	-0.470313	-0.42084	-1.51937	-0.508023	-0.842154	-1.23561	1.13943
1350-1399	13	-0.516497	-0.463866	-1.53866	-0.565231	-0.883367	-0.0906711	0.731726
1300-1349	12	-0.180049	-0.223604	-1.11234	0.624355	-0.21764	-0.984354	-0.806109
1250-1299	13	-0.191944	-0.340634	0.0379776	2.62395	0.202883	-0.274159	-0.582088
1200-1249	12	-0.189551	-0.276048	0.365154	2.82001	0.109123	0.498227	-0.499025
1150-1199	14	-0.0977334	-0.23639	0.555717	2.94298	0.349166	-0.230096	-1.05638
1100-1149	14	0.0155583	-0.0462763	-0.794796	1.4812	-0.110484	0.00958152	-0.362475
1050-1099	14	-0.3606	-0.351005	-0.834668	0.266394	-0.709945	0.434082	0.878201
1000-1049	14	-0.837462	-0.720852	-1.22438	-0.0844624	-0.820072	0.33861	1.43233
950-999	14	-0.577557	-0.636563	-0.635944	1.3095	-0.505977	0.357583	0.881498
900-949	14	-0.450196	-0.634347	0.158767	2.92256	-0.241773	-0.0384573	-0.409874
850-899	13	-0.482207	-0.609573	0.0258536	2.47793	-0.401734	0.960059	0.173423
800-849	12	-0.510051	-0.485651	-0.10858	2.21152	-0.287102	0.29112	0.750203
750-799	13	-0.560355	-0.584235	0.35066	3.57815	-0.436771	-0.638812	0.959896
700-749	12	-0.525601	-0.572096	0.801298	4.23635	-0.300082	0.147053	0.597325
650-699	12	-0.449579	-0.558823	0.360743	3.47737	-0.417818	0.500033	-0.474196
600-649	14	-0.580519	-0.56919	0.402198	3.70457	-0.398273	0.67834	-0.10584
550-599	14	-0.624207	-0.571739	0.346683	3.54272	-0.55267	1.37447	0.0454446
500-549	15	-0.640842	-0.606105	0.194321	3.26315	-0.570655	0.214819	0.32896
450-499	14	-0.681963	-0.682808	-0.381596	2.13843	-0.624816	0.508054	-0.282652
400-449	15	-0.575188	-0.600727	-0.584325	2.02598	-0.731017	0.7201	-0.17943
350-399	14	-0.607916	-0.610707	-0.214529	2.79276	-0.658353	0.00470023	0.673192
300-349	13	-0.599429	-0.593821	-0.424119	2.05818	-0.866288	0.435609	0.832469
250-299	13	-0.799584	-0.67103	-0.967331	0.885527	-1.07279	0.741683	1.9622
200-249	13	-0.900857	-0.555674	-0.805542	1.01302	-0.847154	0.718271	1.04416
150-199	13	-0.580291	-0.403125	0.345789	3.53211	-0.479201	1.17142	0.0684617
100-149	13	-0.23022	-0.153796	1.07074	4.29149	-0.0496097	0.777577	0.0161378
50-99	13	-0.248561	-0.0958398	0.458713	2.6637	0.130296	0.31556	-0.166532
49-0	13	-0.262117	-0.122491	0.696832	2.87132	0.00850922	0.538266	-0.138531
0-49	3	-0.168818	-0.049379	1.21747	3.58123	0.215265	0.500134	-0.775536
n=41	521
	Total	0.730212	0.85394	1.32444	117.145	1.12022	-0.244405	-1.2895
	Avr	0.0178101	0.0208278	0.0323034	2.85719	0.0273225	-0.0059611	-0.0314512

## Sheet: PCA_HID
0.945939	-0.265113
0.945355	-0.211831
0.801333	0.532058
0.891027	0.367062
0.983708	-0.0821625
-0.385842	0.869094
-0.846157	-0.134461

## Sheet: PCA_HID1
4.63223	-1.91129
5.50366	-0.695977
6.59165	1.31508
5.31669	0.431934
2.65479	-1.29602
3.07315	-0.382149
2.38012	-0.198564
0.618511	-1.92245
0.890104	-1.96827
-1.2717	-0.946806
-1.97283	-2.49564
-2.23458	-2.44391
-2.40319	-1.21452
-0.611792	-1.70493
0.0854443	-0.130918
0.0206825	0.836447
0.684552	0.230967
-0.535204	-0.542294
-1.96494	-0.288123
-2.80525	-0.51628
-1.79683	-0.0162613
-0.374257	0.343248
-1.06208	1.16866
-1.16027	0.274803
-0.726626	-0.223096
-0.376257	0.934855
-0.334836	1.08816
-0.524096	1.30981
-0.890402	1.97217
-0.882852	0.640179
-1.20352	0.587905
-1.36157	0.640162
-1.2525	0.102924
-1.72252	0.315148
-2.91327	0.10529
-2.32854	0.288035
-0.731691	1.71174
0.254023	1.63244
-0.0104361	0.606814
-0.0148307	0.999018
0.761277	1.36172

## Sheet: PCA_HID2
5.07085	-2.78898
5.06772	-2.22846
4.29567	5.59723
4.77649	3.86148
5.27332	-0.864347
-2.06837	9.14284
-4.53596	-1.41453
4.63223	-1.91129
5.50366	-0.695977
6.59165	1.31508
5.31669	0.431934
2.65479	-1.29602
3.07315	-0.382149
2.38012	-0.198564
0.618511	-1.92245
0.890104	-1.96827
-1.2717	-0.946806
-1.97283	-2.49564
-2.23458	-2.44391
-2.40319	-1.21452
-0.611792	-1.70493
0.0854443	-0.130918
0.0206825	0.836447
0.684552	0.230967
-0.535204	-0.542294
-1.96494	-0.288123
-2.80525	-0.51628
-1.79683	-0.0162613
-0.374257	0.343248
-1.06208	1.16866
-1.16027	0.274803
-0.726626	-0.223096
-0.376257	0.934855
-0.334836	1.08816
-0.524096	1.30981
-0.890402	1.97217
-0.882852	0.640179
-1.20352	0.587905
-1.36157	0.640162
-1.2525	0.102924
-1.72252	0.315148
-2.91327	0.10529
-2.32854	0.288035
-0.731691	1.71174
0.254023	1.63244
-0.0104361	0.606814
-0.0148307	0.999018
0.761277	1.36172

## Sheet: PCA_HID3
0.93862	-0.261463
0.938906	-0.209601
0.796742	0.50687
0.884261	0.357772
0.974448	-0.0885524
-0.313443	0.875074
-0.812111	-0.101683

## Sheet: PCA_HID4
4.409	-2.99778
4.13281	-1.46137
4.21477	-0.609023
4.57527	-0.909765
4.97889	-1.43727
5.54004	0.102771
6.23578	1.01037
6.04017	0.5839
7.0357	2.53759
5.65287	0.629681
3.41141	-0.983903
3.40584	-1.1644
1.99031	-1.01455
1.62063	-0.652961
2.72166	-0.885327
3.50287	0.0053277
3.0778	1.72447
2.14875	-0.855559
0.478089	-1.87499
0.281467	-1.78725
0.842649	-1.78605
0.641892	-1.27177
0.849156	-1.7313
0.0410284	-1.65152
-1.10308	-0.127476
-1.65303	-1.79042
-2.02913	-1.93175
-1.93485	-2.04216
-1.92655	-2.43447
-2.10946	-2.3851
-2.4007	-1.57683
-2.89724	-0.515666
-2.03224	-1.14037
-1.54203	-1.63365
-0.880202	-1.19455
-0.252819	-1.6702
-0.24235	-0.677841
0.190286	0.267811
0.259293	0.227584
-0.215003	1.38635
0.0779895	0.387902
0.984225	0.722007
0.41643	0.029789
0.0996865	-0.689829
-0.708323	-0.699804
-0.729447	-0.0282353
-1.15328	-0.963865
-1.85361	0.360374
-3.26857	-0.0039116
-2.57902	-0.34363
-2.40487	-0.429053
-2.17078	-0.268628
-1.60734	0.323256
-0.820432	0.0419595
-0.393603	0.345045
-0.438577	0.437397
-0.746912	0.878238
-1.28956	1.47797
-1.14563	1.02041
-1.13644	0.0106499
-0.966254	-0.107076
-1.24298	-0.657355
-0.477566	0.241647
-0.377998	0.379927
-0.299174	0.838159
-0.515104	1.10149
-0.272123	1.13653
-0.445761	0.70797
-0.31019	1.52426
-0.622737	1.35874
-0.493815	0.836565
-0.759046	0.813883
-0.763381	1.65294
-0.773973	2.34857
-0.794824	0.751257
-1.1006	0.257859
-1.13381	-0.083433
-1.258	1.27531
-1.13646	0.526949
-1.26273	0.560259
-1.35742	0.717824
-1.47529	0.0889688
-1.20497	0.172209
-0.913105	0.136213
-1.44036	0.109313
-2.12112	0.787805
-2.47448	0.280577
-2.83713	0.180788
-3.10544	-0.0808475
-2.1648	0.24584
-1.58625	0.649139
-1.23427	1.32328
-0.372699	1.66245
-0.0469311	1.44305
-0.115586	1.1324
0.729952	1.9203
0.154167	0.703839
-0.21815	0.321462
-0.106271	0.813001
-0.10443	0.645948
0.110426	1.18233
0.699012	1.21103

## Sheet: PCA_HID5
5.42162	-2.94953
5.42327	-2.36448
4.60211	5.71792
5.10763	4.03597
5.62856	-0.998946
-1.81049	9.87158
-4.69088	-1.14707
4.409	-2.99778
4.13281	-1.46137
4.21477	-0.609023
4.57527	-0.909765
4.97889	-1.43727
5.54004	0.102771
6.23578	1.01037
6.04017	0.5839
7.0357	2.53759
5.65287	0.629681
3.41141	-0.983903
3.40584	-1.1644
1.99031	-1.01455
1.62063	-0.652961
2.72166	-0.885327
3.50287	0.0053277
3.0778	1.72447
2.14875	-0.855559
0.478089	-1.87499
0.281467	-1.78725
0.842649	-1.78605
0.641892	-1.27177
0.849156	-1.7313
0.0410284	-1.65152
-1.10308	-0.127476
-1.65303	-1.79042
-2.02913	-1.93175
-1.93485	-2.04216
-1.92655	-2.43447
-2.10946	-2.3851
-2.4007	-1.57683
-2.89724	-0.515666
-2.03224	-1.14037
-1.54203	-1.63365
-0.880202	-1.19455
-0.252819	-1.6702
-0.24235	-0.677841
0.190286	0.267811
0.259293	0.227584
-0.215003	1.38635
0.0779895	0.387902
0.984225	0.722007
0.41643	0.029789
0.0996865	-0.689829
-0.708323	-0.699804
-0.729447	-0.0282353
-1.15328	-0.963865
-1.85361	0.360374
-3.26857	-0.0039116
-2.57902	-0.34363
-2.40487	-0.429053
-2.17078	-0.268628
-1.60734	0.323256
-0.820432	0.0419595
-0.393603	0.345045
-0.438577	0.437397
-0.746912	0.878238
-1.28956	1.47797
-1.14563	1.02041
-1.13644	0.0106499
-0.966254	-0.107076
-1.24298	-0.657355
-0.477566	0.241647
-0.377998	0.379927
-0.299174	0.838159
-0.515104	1.10149
-0.272123	1.13653
-0.445761	0.70797
-0.31019	1.52426
-0.622737	1.35874
-0.493815	0.836565
-0.759046	0.813883
-0.763381	1.65294
-0.773973	2.34857
-0.794824	0.751257
-1.1006	0.257859
-1.13381	-0.083433
-1.258	1.27531
-1.13646	0.526949
-1.26273	0.560259
-1.35742	0.717824
-1.47529	0.0889688
-1.20497	0.172209
-0.913105	0.136213
-1.44036	0.109313
-2.12112	0.787805
-2.47448	0.280577
-2.83713	0.180788
-3.10544	-0.0808475
-2.1648	0.24584
-1.58625	0.649139
-1.23427	1.32328
-0.372699	1.66245
-0.0469311	1.44305
-0.115586	1.1324
0.729952	1.9203
0.154167	0.703839
-0.21815	0.321462
-0.106271	0.813001
-0.10443	0.645948
0.110426	1.18233
0.699012	1.21103

## Sheet: 50yr PCA
	XLSTAT 2019.4.2.63677 - Principal Component Analysis (PCA) - Start time: 07/01/2020 at 23:09:14 / End time: 07/01/2020 at 23:09:51 / Microsoft Excel 16.011328
	Observations/variables table: Workbook = Revised Powick PCA 50yr and 20yr.xlsx / Sheet = 50yr / Range = '50yr'!$N$2:$T$43 / 41 rows and 7 columns
	Observation labels: Workbook = Revised Powick PCA 50yr and 20yr.xlsx / Sheet = 50yr / Range = '50yr'!$L$2:$L$43 / 41 rows and 1 column
	PCA type: Correlation
	Standardisation: (n)
	Type of biplot: Distance biplot / Coefficient = Automatic
	Summary statistics:
	Variable	Observations	Obs. with missing data	Obs. without missing data	Minimum	Maximum	Mean	Std. deviation
	Log Grain Size	41	0	41	-0.900857	2.62843	0.0178101	0.985706
	% Sand	41	0	41	-0.720852	2.83396	0.0208278	0.998708
	Net Log pIRSL	41	0	41	-1.53866	2.52076	0.0323034	0.944316
	Net Log pOSL	41	0	41	-0.565231	8.73015	2.85719	2.09323
	LogZr:Rb	41	0	41	-1.07279	2.94736	0.0273225	0.988479
	Mag Sus	41	0	41	-1.74861	1.37447	-0.0059611	0.749953
	Carbonate	41	0	41	-2.27292	1.9622	-0.0314512	0.904701
	Principal Component Analysis:
	Eigenvalues:
		F1	F2	F3	F4	F5	F6	F7
	Eigenvalue	5.0571	1.31313	0.332989	0.240136	0.0378837	0.0119957	0.00676818
	Variability (%)	72.2442	18.759	4.75698	3.43051	0.541195	0.171368	0.0966883
	Cumulative %	72.2442	91.0033	95.7602	99.1907	99.7319	99.9033	100
	Eigenvectors:
		F1	F2	F3	F4	F5	F6	F7
	Log Grain Size	0.420642	-0.231354	0.0552417	0.342448	0.199213	-0.14433	0.767266
	% Sand	0.420382	-0.184857	0.112529	0.466883	0.0314584	-0.450307	-0.595565
	Net Log pIRSL	0.356338	0.464307	0.300281	-0.371816	-0.501856	-0.395169	0.144943
	Net Log pOSL	0.396224	0.320321	0.346667	-0.236032	0.660275	0.325437	-0.150467
	LogZr:Rb	0.437437	-0.0717001	-0.0367914	0.197726	-0.50537	0.707686	-0.0827021
	Mag Sus	-0.171577	0.758425	-0.155605	0.604203	0.0299504	0.0347494	0.0630462
	Carbonate	-0.376271	-0.117339	0.865085	0.258137	-0.123312	0.110894	0.0462834
	Factor loadings:
		F1	F2	F3	F4	F5	F6	F7
	Log Grain Size	0.945939	-0.265113	0.0318773	0.167812	0.0387743	-0.0158077	0.0631221
	% Sand	0.945355	-0.211831	0.0649351	0.22879	0.00612298	-0.0493199	-0.0489966
	Net Log pIRSL	0.801333	0.532058	0.173278	-0.182203	-0.09768	-0.0432809	0.0119243
	Net Log pOSL	0.891027	0.367062	0.200045	-0.115664	0.128514	0.0356435	-0.0123787
	LogZr:Rb	0.983708	-0.0821625	-0.0212305	0.096893	-0.0983639	0.0775094	-0.00680382
	Mag Sus	-0.385842	0.869094	-0.0897923	0.296082	0.00582947	0.00380593	0.00518675
	Carbonate	-0.846157	-0.134461	0.499199	0.126497	-0.0240011	0.0121457	0.00380769
	Correlations between variables and factors:
		F1	F2	F3	F4	F5	F6	F7
	Log Grain Size	0.945939	-0.265113	0.0318773	0.167812	0.0387743	-0.0158077	0.0631221
	% Sand	0.945355	-0.211831	0.0649351	0.22879	0.00612298	-0.0493199	-0.0489966
	Net Log pIRSL	0.801333	0.532058	0.173278	-0.182203	-0.09768	-0.0432809	0.0119243
	Net Log pOSL	0.891027	0.367062	0.200045	-0.115664	0.128514	0.0356435	-0.0123787
	LogZr:Rb	0.983708	-0.0821625	-0.0212305	0.096893	-0.0983639	0.0775094	-0.00680382
	Mag Sus	-0.385842	0.869094	-0.0897923	0.296082	0.00582947	0.00380593	0.00518675
	Carbonate	-0.846157	-0.134461	0.499199	0.126497	-0.0240011	0.0121457	0.00380769
	Contribution of the variables (%):
		F1	F2	F3	F4	F5	F6	F7
	Log Grain Size	17.694	5.35246	0.305165	11.7271	3.96859	2.0831	58.8696
	% Sand	17.6721	3.41722	1.26628	21.798	0.0989632	20.2776	35.4698
	Net Log pIRSL	12.6977	21.5581	9.01688	13.8247	25.186	15.6158	2.10085
	Net Log pOSL	15.6993	10.2605	12.0178	5.57109	43.5963	10.5909	2.26402
	LogZr:Rb	19.1351	0.51409	0.135361	3.90956	25.5399	50.082	0.683964
	Mag Sus	2.94386	57.5208	2.4213	36.5061	0.0897028	0.120752	0.397483
	Carbonate	14.158	1.37685	74.8372	6.66346	1.52058	1.22975	0.214215
	Squared cosines of the variables:
		F1	F2	F3	F4	F5	F6	F7
	Log Grain Size	0.8948	0.0702848	0.00101616	0.028161	0.00150345	0.000249883	0.00398441
	% Sand	0.893695	0.0448726	0.00421656	0.0523448	3.74909e-05	0.00243245	0.00240066
	Net Log pIRSL	0.642134	0.283086	0.0300252	0.0331981	0.00954138	0.00187323	0.00014219
	Net Log pOSL	0.79393	0.134734	0.040018	0.0133782	0.0165159	0.00127046	0.000153233
	LogZr:Rb	0.967681	0.00675068	0.000450735	0.00938826	0.00967546	0.0060077	4.62919e-05
	Mag Sus	0.148874	0.755324	0.00806265	0.0876643	3.39827e-05	1.44851e-05	2.69024e-05
	Carbonate	0.715981	0.0180798	0.249199	0.0160014	0.000576053	0.000147518	1.44985e-05
	Values in bold correspond for each variable to the factor for which the squared cosine is the largest
	Factor scores:
		F1	F2	F3	F4	F5	F6	F7
	1950-Present	4.63223	-1.91129	1.19872	0.111345	0.098964	-0.112139	0.190209
	1900-1949	5.50366	-0.695977	-0.292991	0.672786	0.265043	-0.0552484	-0.0908335
	1850-1899	6.59165	1.31508	-0.0733384	0.70269	-0.0382678	0.0518313	-0.0479796
	1800-1849	5.31669	0.431934	0.118754	0.260629	-0.181293	0.139509	-0.0745812
	1750-1799	2.65479	-1.29602	0.522729	0.293802	-0.205014	0.0792799	-0.138232
	1700-1749	3.07315	-0.382149	0.0385343	-0.254185	0.101627	-0.107215	-0.118627
	1650-1699	2.38012	-0.198564	0.589719	-0.760034	0.320182	-0.0910818	0.128084
	1600-1649	0.618511	-1.92245	-0.594793	0.134433	-0.0274546	0.21771	0.146583
	1550-1599	0.890104	-1.96827	-0.767682	0.110841	0.101238	-0.00776154	0.129299
	1500-1549	-1.2717	-0.946806	-0.414183	0.239638	0.0527614	0.105962	0.022843
	1450-1499	-1.97283	-2.49564	0.573889	-0.546482	0.0184069	-0.0886499	-0.0622814
	1400-1449	-2.23458	-2.44391	0.282721	-0.218833	-0.115009	-0.140921	-0.0845999
	1350-1399	-2.40319	-1.21452	-0.374266	0.566545	-0.00983678	-0.142023	-0.0140313
	1300-1349	-0.611792	-1.70493	-1.31718	-0.545511	0.0486754	-0.045177	-0.126376
	1250-1299	0.0854443	-0.130918	-0.573758	-0.562759	-0.157717	0.203318	0.00457009
	1200-1249	0.0206825	0.836447	-0.506355	-0.0491418	-0.200293	0.0443087	0.0820181
	1150-1199	0.684552	0.230967	-0.810273	-0.794538	-0.320288	0.0218704	0.0399079
	1100-1149	-0.535204	-0.542294	-0.823304	0.343386	0.120635	0.0245616	0.0061996
	1050-1099	-1.96494	-0.288123	0.0385693	0.804677	-0.176302	-0.215519	0.127121
	1000-1049	-2.80525	-0.51628	0.345683	0.717206	-0.211355	0.118352	-0.0305049
	950-999	-1.79683	-0.0162613	0.244136	0.374776	-0.112731	0.171656	0.0599005
	900-949	-0.374257	0.343248	-0.398999	-0.722896	0.0263715	0.0816353	0.0420624
	850-899	-1.06208	1.16866	-0.154373	0.33187	-0.00718861	0.0646808	0.142329
	800-849	-1.16027	0.274803	0.464812	0.108933	-0.187653	0.150547	0.00729606
	750-799	-0.726626	-0.223096	1.23169	-1.02275	-0.000813149	0.0974662	-0.0565297
	700-749	-0.376257	0.934855	0.969251	-0.695613	-0.0145296	0.090401	0.022186
	650-699	-0.334836	1.08816	-0.401052	-0.445792	0.219186	-0.0614962	0.0453732
	600-649	-0.524096	1.30981	-0.039815	-0.283411	0.188576	0.0490881	-0.0290494
	550-599	-0.890402	1.97217	-0.0815511	0.320867	0.244927	-0.00570797	0.021375
	500-549	-0.882852	0.640179	0.336405	-0.476226	0.156422	0.000739413	-0.0568093
	450-499	-1.20352	0.587905	-0.700323	-0.117481	0.220542	0.00741109	-0.052682
	400-449	-1.36157	0.640162	-0.709636	0.233845	0.367475	-0.0319165	-0.00902242
	350-399	-1.2525	0.102924	0.507944	-0.33985	0.222171	0.0664314	-0.0500098
	300-349	-1.72252	0.315148	0.391219	0.193914	0.205697	-0.0801015	0.0299123
	250-299	-2.91327	0.10529	1.03672	0.971565	0.0434344	0.0352579	0.0217751
	200-249	-2.32854	0.288035	0.225268	0.672894	-0.0109962	-0.0023447	-0.180472
	150-199	-0.731691	1.71174	0.000276441	0.273591	0.206969	-0.0438956	-0.0674963
	100-149	0.254023	1.63244	0.425188	-0.110315	-0.0920721	-0.11081	0.0426229
	50-99	-0.0104361	0.606814	-0.125778	-0.0527154	-0.371105	-0.0454097	-0.0474893
	49-0	-0.0148307	0.999018	-0.0332018	-0.023643	-0.368366	-0.17379	0.0105324
	0-49	0.761277	1.36172	-0.349381	-0.418056	-0.421021	-0.26081	0.0154063
	Contribution of the observations (%):
		F1	F2	F3	F4	F5	F6	F7
	1950-Present	10.3489	6.7852	10.5251	0.125922	0.630548	2.55685	13.0378
	1900-1949	14.6089	0.899699	0.628773	4.5974	4.52269	0.620624	2.97328
	1850-1899	20.9558	3.21225	0.0393958	5.01518	0.0942826	0.546228	0.829578
	1800-1849	13.6332	0.346532	0.103296	0.689931	2.11606	3.95727	2.00449
	1750-1799	3.39918	3.11984	2.00142	0.876734	2.70602	1.27795	6.88588
	1700-1749	4.55493	0.271252	0.0108763	0.656233	0.664946	2.33722	5.07121
	1650-1699	2.7322	0.0732333	2.54728	5.86712	6.60021	1.68676	5.91203
	1600-1649	0.184506	6.86467	2.5913	0.183556	0.0485281	9.63709	7.74307
	1550-1599	0.382117	7.19576	4.31667	0.124784	0.659857	0.0122486	6.02467
	1500-1549	0.779984	1.66506	1.25652	0.583269	0.179225	2.28289	0.188041
	1450-1499	1.87712	11.5683	2.41237	3.03327	0.0218135	1.59789	1.39785
	1400-1449	2.40828	11.0938	0.585466	0.486388	0.851591	4.03774	2.57919
	1350-1399	2.78542	2.73978	1.026	3.26007	0.00622974	4.10116	0.0709476
	1300-1349	0.180519	5.39911	12.708	3.0225	0.152539	0.414977	5.75534
	1250-1299	0.00352112	0.031835	2.41126	3.21665	1.60147	8.40509	0.0075265
	1200-1249	0.00020631	1.29952	1.87801	0.0245279	2.58282	0.399178	2.42417
	1150-1199	0.22601	0.099085	4.80894	6.41193	6.60457	0.0972531	0.573932
	1100-1149	0.138151	0.546232	4.96487	1.19763	0.936931	0.12266	0.0138507
	1050-1099	1.86214	0.154192	0.0108961	6.57661	2.00115	9.44406	5.82344
	1000-1049	3.79542	0.495084	0.87527	5.22453	2.87599	2.84799	0.335338
	950-999	1.55714	0.000491156	0.436567	1.4266	0.818178	5.99108	1.29302
	900-949	0.0675545	0.218839	1.16609	5.30775	0.0447747	1.35502	0.637576
	850-899	0.544035	2.53678	0.174553	1.11865	0.003327	0.850629	7.30011
	800-849	0.649285	0.140265	1.58249	0.120525	2.26712	4.60825	0.0191832
	750-799	0.254646	0.0924471	11.1119	10.6242	4.25701e-05	1.93151	1.15159
	700-749	0.0682785	1.62329	6.88112	4.91468	0.0135916	1.66164	0.177379
	650-699	0.0540728	2.19935	1.17811	2.01847	3.09307	0.768929	0.741896
	600-649	0.132476	3.18658	0.0116113	0.815818	2.28947	0.48994	0.304102
	550-599	0.382373	7.22434	0.0487132	1.0457	3.86224	0.0066245	0.164648
	500-549	0.375916	0.761221	0.82892	2.30349	1.57529	0.000111164	1.16301
	450-499	0.698592	0.641981	3.59239	0.140182	3.13147	0.0111674	1.00016
	400-449	0.894123	0.761179	3.68857	0.555411	8.69402	0.207119	0.0293353
	350-399	0.756606	0.0196763	1.88981	1.1731	3.1779	0.897296	0.901269
	300-349	1.43102	0.184474	1.12106	0.381924	2.72408	1.30458	0.322436
	250-299	4.09332	0.0205913	7.87246	9.58744	0.121459	0.252757	0.170869
	200-249	2.61507	0.154099	0.371696	4.59888	0.00778479	0.0011178	11.7371
	150-199	0.258208	5.44231	5.59748e-07	0.760262	2.75787	0.391769	1.64174
	100-149	0.0311216	4.94974	1.32419	0.123603	0.545783	2.49659	0.654682
	50-99	5.25279e-05	0.683942	0.115877	0.028225	8.86662	0.419264	0.812711
	49-0	0.000106082	1.85376	0.0080744	0.0056776	8.73621	6.14098	0.0399758
	0-49	0.279512	3.44417	0.8941	1.77512	11.4122	13.8305	0.0855339
	Squared cosines of the observations:
		F1	F2	F3	F4	F5	F6	F7
	1950-Present	0.806115	0.137237	0.0539827	0.000465757	0.000367934	0.000472425	0.00135918
	1900-1949	0.964821	0.0154289	0.00273433	0.0144178	0.00223757	9.72262e-05	0.000262807
	1850-1899	0.951077	0.0378555	0.000117731	0.0108082	3.2055e-05	5.88047e-05	5.03896e-05
	1800-1849	0.988582	0.00652477	0.000493205	0.00237562	0.00114946	0.00068067	0.000194531
	1750-1799	0.769878	0.183479	0.029848	0.00942913	0.00459123	0.000686576	0.00208727
	1700-1749	0.97441	0.0150674	0.000153204	0.00666613	0.00106561	0.001186	0.00145192
	1650-1699	0.838381	0.00583504	0.0514676	0.0854889	0.0151718	0.00122774	0.00242793
	1600-1649	0.0846385	0.817684	0.0782717	0.00399838	0.000166764	0.0104865	0.00475382
	1550-1599	0.149629	0.731647	0.1113	0.00232024	0.00193561	1.1377e-05	0.00315735
	1500-1549	0.586552	0.325131	0.0622185	0.0208279	0.00100965	0.00407223	0.000189253
	1450-1499	0.361703	0.578813	0.0306077	0.0277541	3.14874e-05	0.00073035	0.000360489
	1400-1449	0.448472	0.536433	0.00717892	0.00430099	0.00118798	0.00178358	0.000642811
	1350-1399	0.746949	0.190775	0.0181166	0.0415129	1.25147e-05	0.00260875	2.54629e-05
	1300-1349	0.0701702	0.544955	0.325264	0.0557896	0.000444185	0.000382631	0.00299415
	1250-1299	0.0099118	0.0232693	0.446934	0.429963	0.0337708	0.0561228	2.83553e-05
	1200-1249	0.000424502	0.694305	0.254439	0.00239649	0.039811	0.00194828	0.00667564
	1150-1199	0.244777	0.0278649	0.342941	0.329751	0.0535842	0.000249845	0.000831904
	1100-1149	0.205858	0.211348	0.487134	0.0847407	0.0104585	0.000433553	2.7622e-05
	1050-1099	0.82382	0.0177129	0.000317408	0.138159	0.00663208	0.00991069	0.00344802
	1000-1049	0.891269	0.0301881	0.0135338	0.0582576	0.00505928	0.00158641	0.000105391
	950-999	0.929177	7.61022e-05	0.0171534	0.0404231	0.00365737	0.00848009	0.00103263
	900-949	0.147627	0.124178	0.167792	0.550781	0.000732986	0.00702399	0.00186473
	850-899	0.425305	0.514948	0.00898524	0.0415264	1.9484e-05	0.00157739	0.00763791
	800-849	0.788379	0.0442238	0.126523	0.00694916	0.0206217	0.0132728	3.11739e-05
	750-799	0.167427	0.015783	0.481067	0.331697	2.09673e-07	0.00301239	0.00101334
	700-749	0.0578371	0.357048	0.383804	0.197685	8.62467e-05	0.00333875	0.000201092
	650-699	0.0655772	0.692588	0.0940784	0.116239	0.0281006	0.00221201	0.00120417
	600-649	0.130117	0.812696	0.000750941	0.0380492	0.0168454	0.00114147	0.000399748
	550-599	0.163387	0.801561	0.00137058	0.0212176	0.0123629	6.71443e-06	9.41581e-05
	500-549	0.500624	0.263232	0.0726878	0.145667	0.0157156	3.51164e-07	0.00207288
	450-499	0.616416	0.147089	0.208719	0.00587353	0.020699	2.33738e-05	0.00118111
	400-449	0.626715	0.138537	0.170239	0.018486	0.0456504	0.000344364	2.75191e-05
	350-399	0.780814	0.00527264	0.128417	0.0574868	0.0245679	0.00219654	0.00124481
	300-349	0.8973	0.0300356	0.0462859	0.0113717	0.0127957	0.00194039	0.000270587
	250-299	0.806719	0.00105375	0.102161	0.0897234	0.00017932	0.000118161	4.50694e-05
	200-249	0.897507	0.0137328	0.00839982	0.0749484	2.00148e-05	9.10003e-07	0.00539122
	150-199	0.149145	0.816263	2.12893e-08	0.0208525	0.0119334	0.000536779	0.00126915
	100-149	0.0219116	0.904902	0.0613889	0.00413234	0.00287861	0.00416952	0.000616898
	50-99	0.000205895	0.696117	0.0299076	0.00525347	0.260355	0.00389824	0.00426347
	49-0	0.000188649	0.856004	0.000945482	0.000479441	0.116383	0.0259047	9.51443e-05
	0-49	0.194727	0.623041	0.0410147	0.0587231	0.059559	0.0228554	7.97507e-05
	Values in bold correspond for each observation to the factor for which the squared cosine is the largest
